# Supplementary material
Source: PubMed Central journal article supplement (PMC3702055)

## Supplementary Material

The process of acid-catalyzed deamidation (at 50 °C with 1% TFA) of the model peptide EWSVNSVGK in H<sub>2</sub>O<sup>18</sup> was monitored by LC-MS analysis. The relative amount of deamidation-produced aspartyl peptide was estimated based on the peak areas generated from the XIC of m/z range from 503 to 511, and the mass spectra acquired across the deamidation peaks are shown in the following figure.

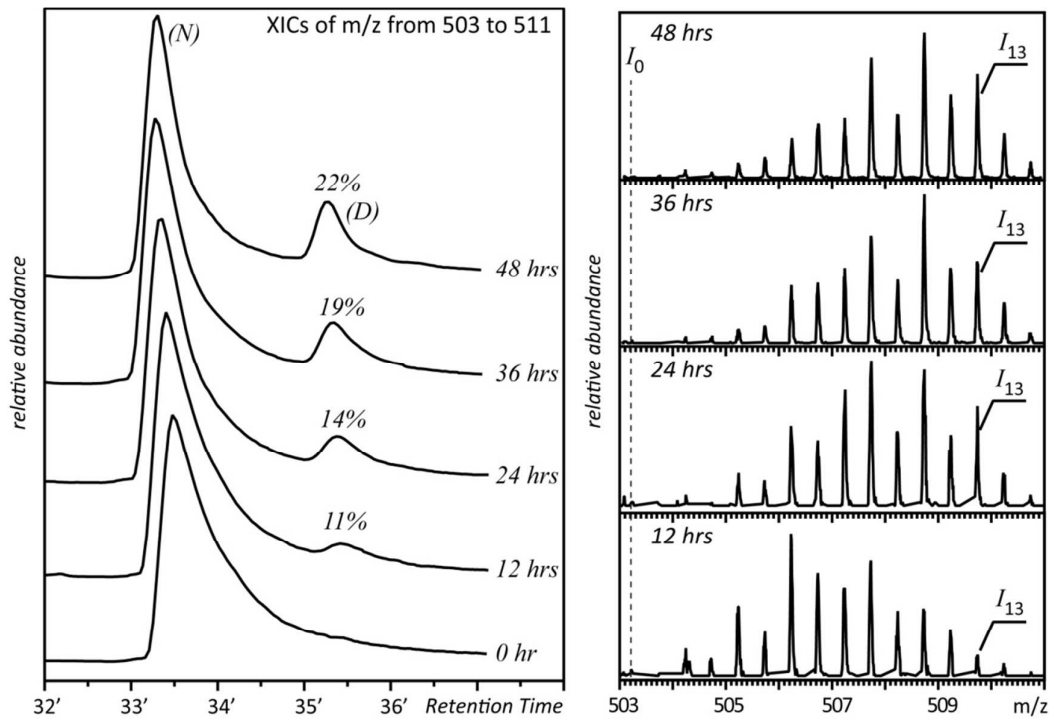

Supplement: NIHMS487410-supplement-1_si_001.pdf [file NIHMS487410-supplement-1_si_001.pdf]
